# Supplementary material for: Low-Cost Biobased Coatings for AM60 Magnesium Alloys for Food Contact and Harsh Environment Applications
Source: MDPI journal article supplement (doi:10.3390/ijms22094915), 2021-05-06
Supplement: s1 [file s1]

Table S1: Specific migration values of selected metals. Test performed on flat samples with simulant B (acetic acid 3%) at room temperature.

|                                                   | Al                  | Co                 | Cr                 | Cu                 | Fe                    | Mg                 | Mn                    | Ni                    | S                  | Ti                 | V                  | Zn                 | As                 | Ba                    | Cd                 | Mo                 | Pb                 |
|---------------------------------------------------|---------------------|--------------------|--------------------|--------------------|-----------------------|--------------------|-----------------------|-----------------------|--------------------|--------------------|--------------------|--------------------|--------------------|-----------------------|--------------------|--------------------|--------------------|
|                                                   | mg/dm <sup>2</sup>  | mg/dm <sup>2</sup> | mg/dm <sup>2</sup> | mg/dm <sup>2</sup> | mg/dm <sup>2</sup>    | mg/dm <sup>2</sup> | mg/dm <sup>2</sup>    | mg/dm <sup>2</sup>    | mg/dm <sup>2</sup> | mg/dm <sup>2</sup> | mg/dm <sup>2</sup> | mg/dm <sup>2</sup> | mg/dm <sup>2</sup> | mg/dm <sup>2</sup>    | mg/dm <sup>2</sup> | mg/dm <sup>2</sup> | mg/dm <sup>2</sup> |
| Simulant B<br>24h RT PA 11<br>transparent         | <LOD                | <LOD               | <LOD               | <LOD               | <LOD                  | <LOD               | <LOD                  | <LOD                  | <LOD               | <LOD               | <LOD               | <LOD               | <LOD               | <LOD                  | <LOD               | <LOD               | <LOD               |
| Simulant B<br>24h RT<br>siliconic brown           | 0.016<br>±<br>0.002 | <LOD               | <LOD               | <LOD               | 0.0013<br>±<br>0.0006 | 1.24 ±<br>0.07     | 0.0004<br>±<br>0.0002 | <LOD                  | <LOD               | <LOD               | <LOD               | <LOD               | <LOD               | <LOD                  | <LOD               | <LOD               | <LOD               |
| Simulant B 2h<br>RT GSF<br>lacquer<br>transparent | 13 ± 2              | <LOD               | <LOD               | <LOD               | 0.0007<br>±<br>0.0009 | 231 ±<br>26        | 0.45 ±<br>0.05        | 0.0012<br>±<br>0.0007 | <LOD               | <LOD               | <LOD               | <LOD               | <LOD               | 0.0007<br>±<br>0.0003 | <LOD               | <LOD               | <LOD               |
| LOD of ICP-<br>OES (mg/l)                         | 0.003               | 0.002              | 0.2                | 0.02               | 0.01                  | 0.01               | 0.00022               | 0.008                 | 0.06               | 0.002              | 0.002              | 0.01               | 0.01               | 0.0001                | 0.002              | 0.009              | 0.02               |

Table S2: Specific migration values of selected metals. Test performed on prototype cups.

[illegible]

Table S3: Specific migration limits for metals from the Regulation (EU) 2017/752 amending Regulation (EU) 10/2011 (Table 1 Annex II)

| <b>Metal</b> | <b>Limit (mg/kg)</b> |
|--------------|----------------------|
| Al           | 1                    |
| Ba           | 1                    |
| Co           | 0.05                 |
| Cr           | ND (LOD <0.01)       |
| Cu           | 5                    |
| Fe           | 48                   |
| Mn           | 0.6                  |
| Ni           | 0.02                 |
| Zn           | 5                    |
| Mo           | 0.12                 |
| V            | 0.01                 |
| As           | 0.002                |
| Cd           | ND (LOD < 0.002)     |
| Pb           | ND (LOD <0.01)       |
| Mg           | -                    |

\*The conversion of the data in mg/dm<sup>2</sup> to mg/kg to compare the obtained specific migrations with migration limits can be made according to art.17 of the (UE) N. 10/2011 that states that for containers and other articles, containing or intended to contain, less than 500 millilitres or grams the value of migration shall be expressed in mg/kg applying a surface to volume ratio of 6 dm<sup>2</sup> per kg of food.

Table S4: IR bands assignment

| Sample      | cm <sup>-1</sup> | Assignment                                      |
|-------------|------------------|-------------------------------------------------|
|             |                  |                                                 |
| Nanoceramic | 1092             | Si-O-Si asymm. Str.                             |
|             | 1423             | Si-CH <sub>3</sub> deform.                      |
|             |                  |                                                 |
| Siliconic   | 844              | Si-OH str.                                      |
|             | 1050 - 1200      | Si-O-Si asymm. Str.                             |
|             | 1228             | Si-CH <sub>2</sub> R                            |
|             |                  |                                                 |
| GSF laquer  | 1720             | C=O str.                                        |
|             | 1234             | C-O-C asymm str.                                |
|             | 2935 - 2854      | CH str.                                         |
|             | 3350             | OH str. Of TiO <sub>2</sub> in the white sample |
|             |                  |                                                 |
| PA 11       | 3305             | NH str.                                         |
|             | 1543             | NH bend.                                        |
|             | 2920 , 2850      | CH <sub>2</sub> symm. Str.                      |
|             | 1635             | C=O str.                                        |
|             | 1469             | CH <sub>2</sub> bend.                           |
|             | 717              | CH <sub>2</sub> rocking                         |

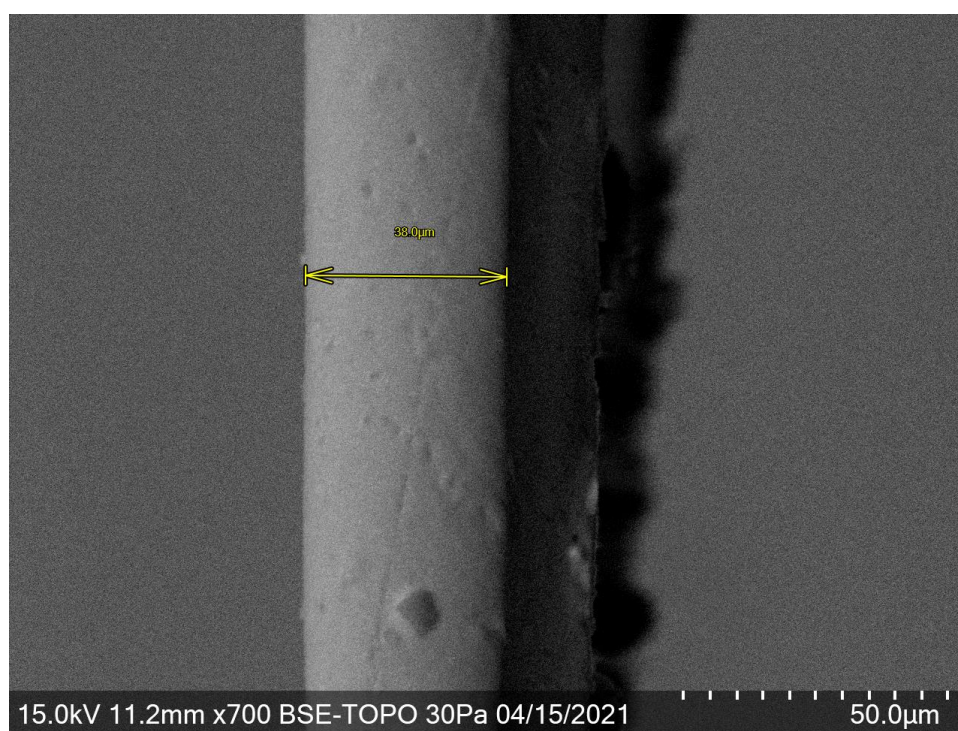

Figure S1: SEM image of the cross section of the slice cut from GSF lacquer 40 μm.
